# Supplementary material for: Alignment of chevron-shaped molecules for photonic and electronic applicationsElectronic supplementary information (ESI) available: synthetic details and analytical data for three chevron-shaped molecules. See http://www.rsc.org/suppdata/jm/b2/b201801m/
Source: Royal Society of Chemistry journal article supplement (doi:10.1039/b201801m), 2002-06-10
Supplement: b201801m.doc [file b201801m.doc]

# Electronic supplementary data

1-butyl-2,6-dimethylpyridinium iodide

A solution of 3,6-dimethylpyridine (1.1 g, 10 mmol) and iodobutane (1.8 g, 10 mmol) in methanol (10 cm3) was heated at reflux for 48 h. A pale yellow precipitate, obtained when cooled, was recrystallised from methanol: yield 31%. 1H NMR (CDCl3, 250 MHz, J/Hz): H 1.06 (t, J 7.3, 3H, CH3); 1.61 (sextet, J 7.4, 2H, CH2); 1.84 (quintet, J 7.3, 2H, *CH2*CH2N+); 3.07 (s, 6H, CH3); 4.64 (t, J 8.5, 2H, CH2N+); 7.51 (d, J 7.9, 2H, Py-H); 8.20 (t, J 7.9, 1H, Py-H). *m/z* (FAB): 164 (M+ - I-, 100%).

1-butyl-2,6-bis[2-(7-diethylamino-2-oxo-*2H*-chromen-3-yl)vinyl]pyridinium iodide

To a solution of 1-butyl-2,6-dimethylpyridinium iodide (0.29 g, 1 mmol) and 7-diethylamino-2-oxa-*2H*-chromene-3-carboxaldehyde (0.49 g, 2 mmol) in methanol (30 cm3) was added piperidine (0.1 cm3) and the resultant mixture heated at reflux for 48h. The precipitate, obtained upon cooling, was purified by column chromatography on silica gel, eluting with a mixture of methanol/chloroform (20:80 *v/v*), followed by preparative plate chromatography and recrystallisation from methanol: yield 10%. max (CHCl3): 536 nm. C39H44IN3O4 requires: C, 62.82; H, 5.95; N, 5.63%. Found: C, 62.4; H, 6.0; N, 5.5%. H (CDCl3, 250 MHz, J/Hz): 1.05 (t, J 6.9, 3H, CH3); 1.70 (br m, 14H, CH2 and (*CH3*CH2)2N); 1.95 (quintet, J 7.4, 2H, *CH2*CH2N+); 3.46 (quartet, J 6.6, 8H, (CH3*CH2*)2N); 4.75 (t, J 7.0, 2H, CH2N+); 6.49 (s, 2H, Ar-H); 6.66 (d, J 9.0, 2H, Ar-H); 7.10 (d, J 14.6, 2H, C=C-H); 7.42 (d, J 8.4, 2H, Ar-H); 7.47 (d, J 15.0, 2H, C=C-H); 7.70 (d, J 8.0, 2H, Py-H); 7.81 (s, 2H, Ar-H); 8.14 (t, J 8.0, 1H, Py-H). *m/z* (FAB): 618 (M+ - I-, 100%).

1-butyl-2,6-bis[2-(4-dibutylaminophenyl)vinyl]pyridinium iodide

The dye was obtained from 4-dibutylaminobenzaldehyde by adapting the procedure described above: yield 30%. max (CHCl3): 531 nm. C41H60IN3 requires: C, 68.22; H, 8.38; N, 5.82%. Found: C, 68.0; H, 8.1; N, 5.6%. 1H NMR (CDCl3, 250 MHz, J/Hz): H 0.98 (t, J 7.2, 12H, CH3); 1.07 (t, J 7.3, 3H, CH3); 1.38 (sextet, J 7.4, 8H, CH3*CH2*); 1.55-1.68 (m, 10H, CH2); 1.95 (quintet, J 7.2, 2H, *CH2*CH2N+); 3.34 (t, J 7.6, 8H, (CH2)2N); 4.73 (t, J 7.8, 2H, CH2N+); 6.67 (d, J 8.8, 4H, Ar-H); 7.06 (d, J 15.4, 2H, C=C-H); 7.49 (d, J 15.5, 2H, C=C-H); 7.55 (d, J 8.8, 4H, Ar-H); 7.88 (d, J 8.1, 2H, Py-H); 8.21 (t, J 8.1, 1H, Py-H). *m/z* (FAB): 594 (100%, M+ - I-).

1-butyl-2,6-bis[2-(4-butoxyphenyl)vinyl]pyridinium iodide

The dye was obtained from 4-butoxybenzaldehyde by adapting the procedures described above: yield 30%. max (CHCl3): 418 nm.C33H42INO2 requires: C, 64.81; H, 6.92; N, 2.29%. Found: C, 64.5; H, 7.0; N, 2.0%. 1H NMR (CDCl3, 200 MHz, J/Hz): H 0.98 (t, J 7.3, 6H, CH3); 1.04 (t, J 7.2, 3H, CH3); 1.47-1.67 (m, 6H, CH2); 1.79 (quintet, J 7.6, 4H, *CH2*CH2O); 1.94 (quintet, J 7.6, 2H, *CH2*CH2N+); 4.02 (t, J 6.6, 4H, CH2O); 4.83 (t, J 6.5, CH2N+); 6.96 (d, J 8.8, 4H, Ar-H); 7.28 (d, J 15.8, 2H, C=C-H); 7.54 (d, J 15.8, 2H, C=C-H); 7.64 (d, J 8.8, 4H, Ar-H); 8.02 (d, J 7.9, 2H, Py-H); 8.30 (t, J 8.2, 1H, Py-H). *m/z* (FAB): 484 (100%, M+ - I-).
